# Supplementary material for: Effect of the 2022 summer drought across forest types in Europe
Source: Copernicus journal article supplement (doi:10.5194/bg-21-5481-2024), 2024-12-11

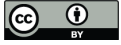

*Supplement of*

## **Effect of the 2022 summer drought across forest types in Europe**

**Mana Gharun et al.**

*Correspondence to:* Mana Gharun (mana.gharun@uni-muenster.de)

The copyright of individual parts of the supplement might differ from the article licence.

**Supplementary Material**  
**Effect of the 2022 summer drought across forest types in Europe**

**Figure S1** Comparisons of standardized SM anomalies (SMz) of 0-100 cm SM layer (y-axis) and 0-7 cm SM layer (x-axis) during the three drought years of 2003, 2018, and 2022 in Europe across forested areas, in terms of spatial coverage (a, b), percentage of total area affected (c) and correlation of the anomalies (d).

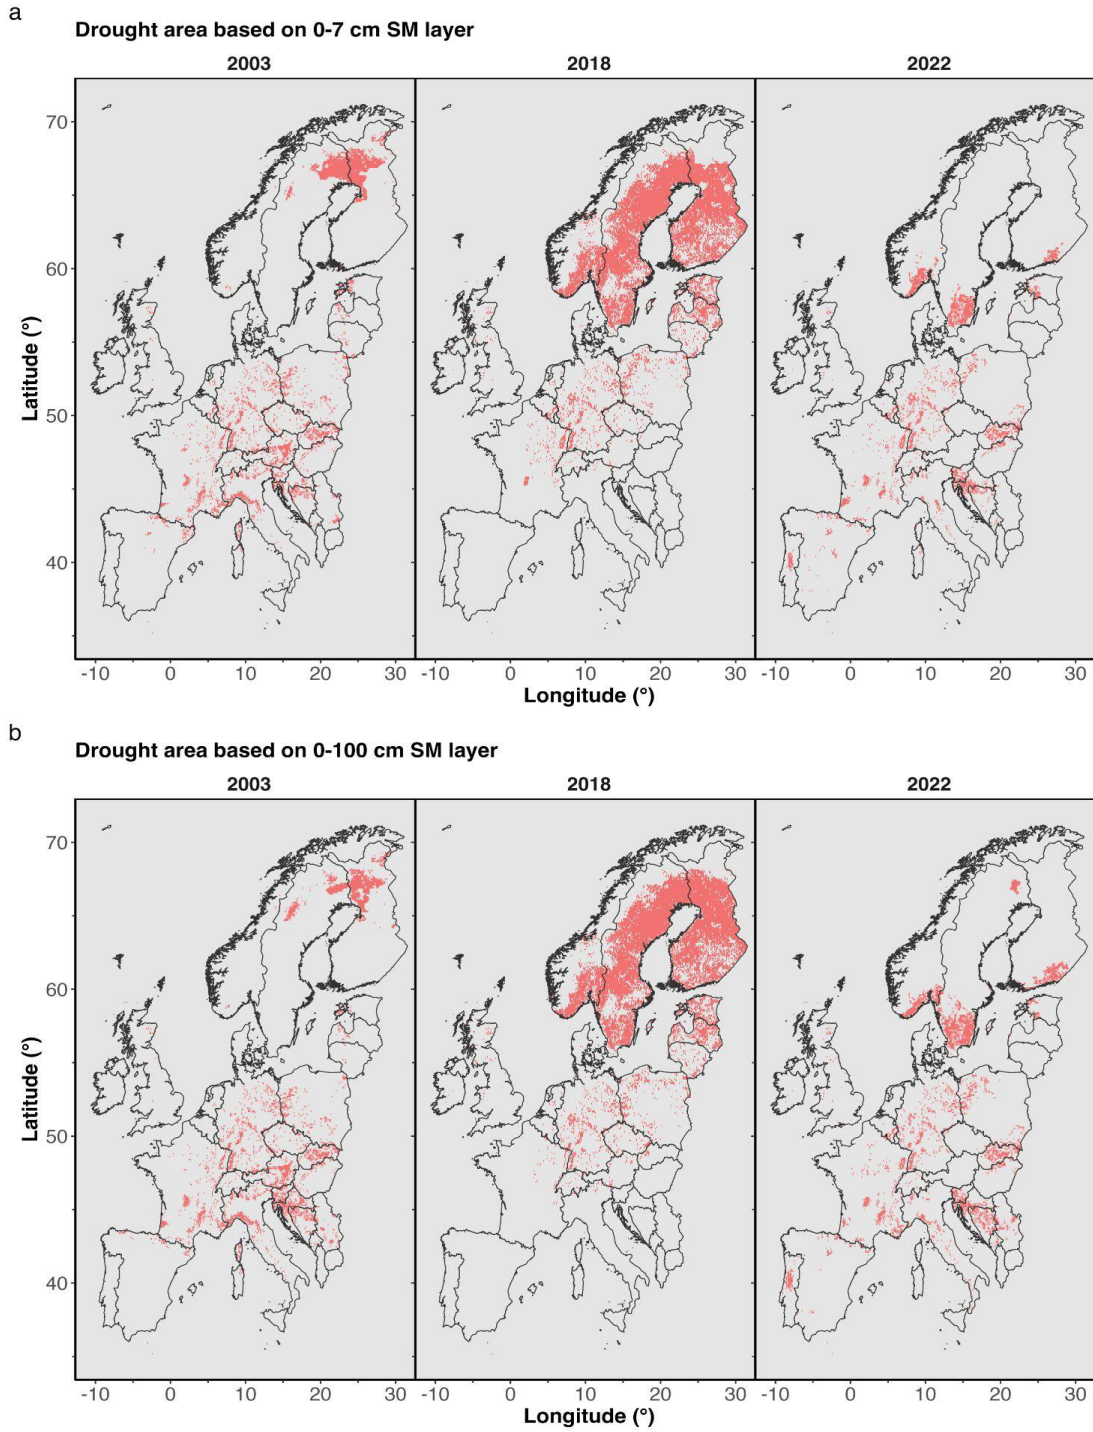

c)

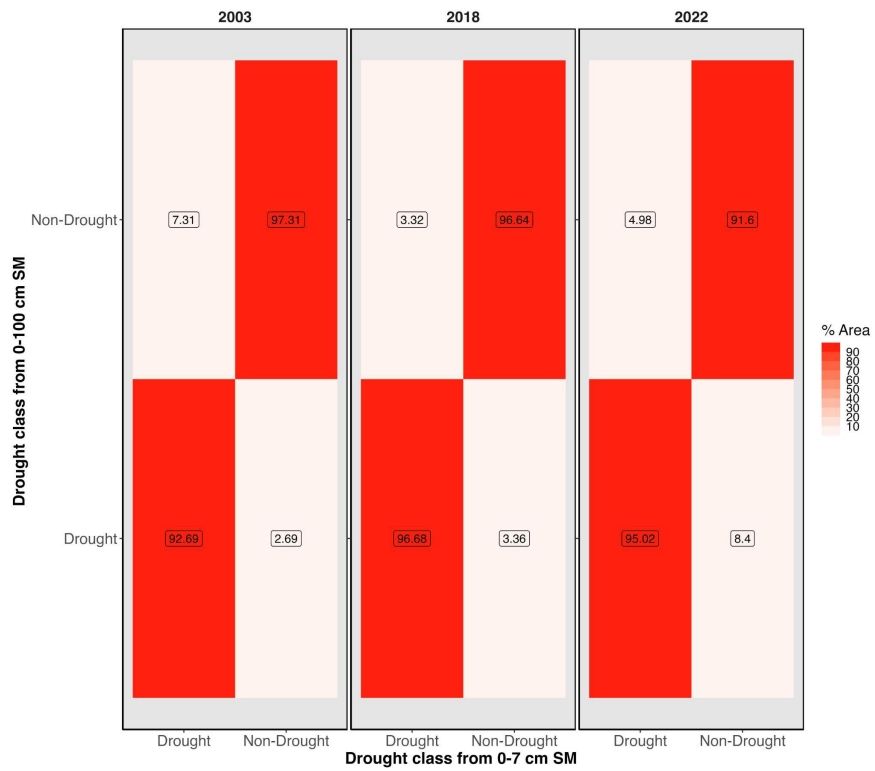

d)

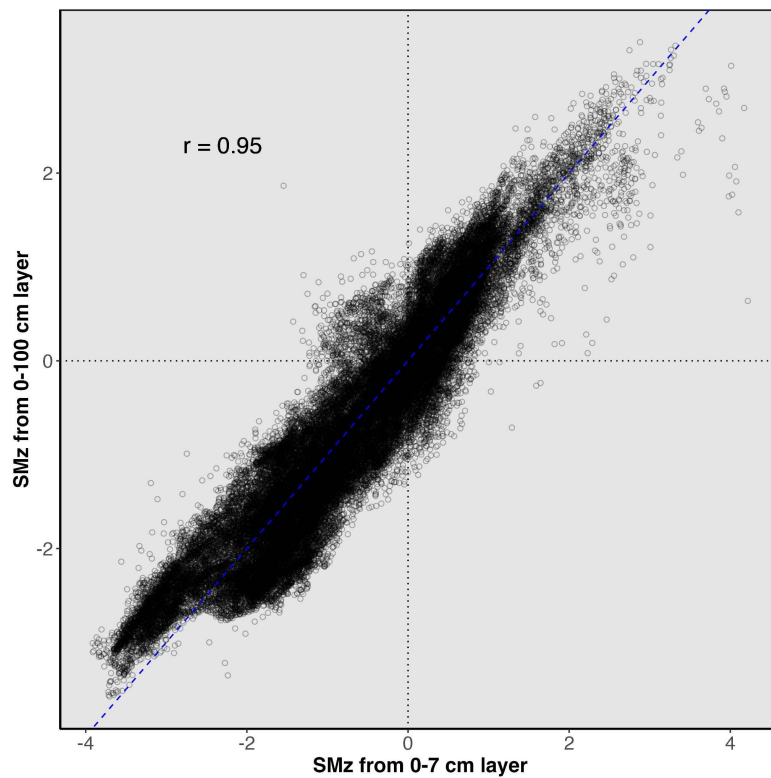

**Figure S2** Relationship between GOSIF and NIRv anomalies during 2003, 2018, and 2022 for different forest types.

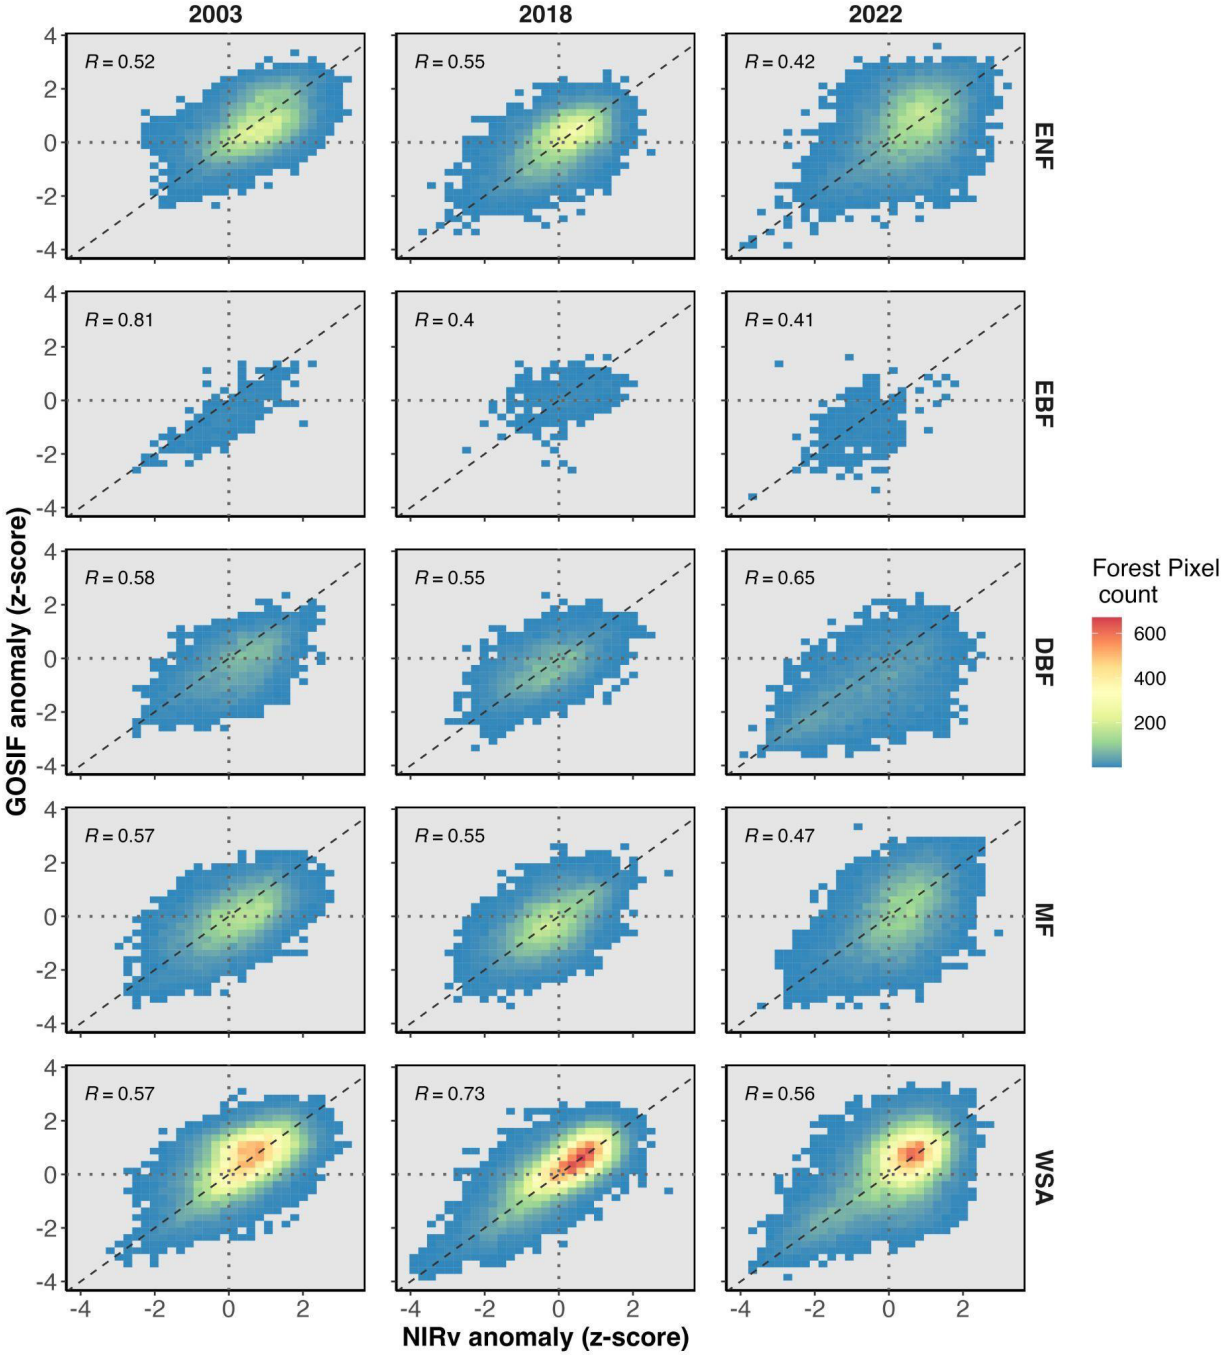

**Figure S3** Temporal partial correlation coefficient of NIRv with SM and VPD during summer for detected (a) drought areas and (b) normal areas.

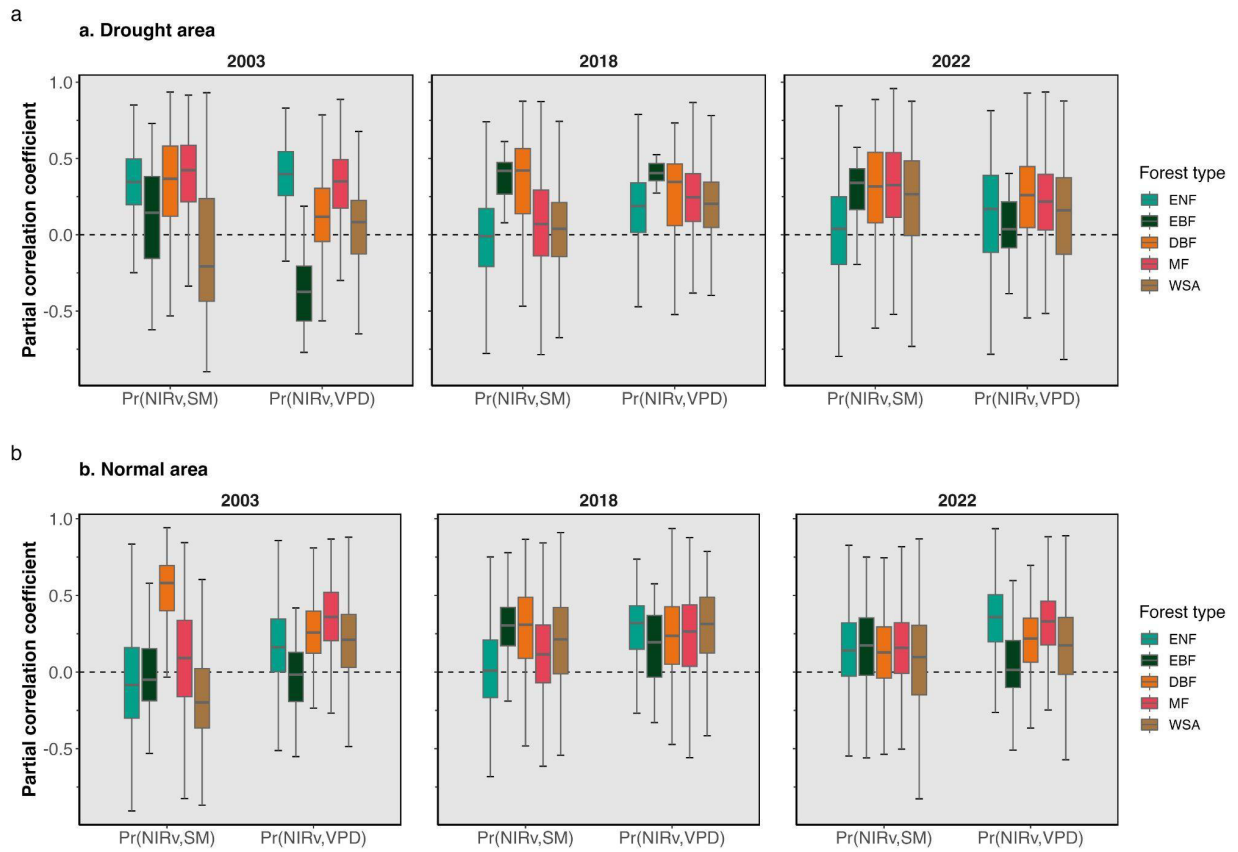

Supplement: Supplementary file 1 [file bg-21-5481-2024-supplement.pdf]
